# Supplementary material for: Disparities in Healthcare and HBV Vaccination by Smoking Status: Findings from the National Health and Nutrition Examination Survey (NHANES) 2017–2018
Source: Healthcare (Basel). 2023 Dec 23;12(1):41. doi: 10.3390/healthcare12010041 (PMC10779267; doi:10.3390/healthcare12010041)
Supplement: Supplementary file 1 [file healthcare-12-00041-s001.zip › healthcare-2725400-supplementary.pdf]

Table S1. The association between gender and socio-economic status and healthcare accessibility, HBV vaccination, general health condition, and health insurance status.

|                                 | Female<br>OR (95% CI)                      | Male<br>OR (95% CI)           | p-value          |
|---------------------------------|--------------------------------------------|-------------------------------|------------------|
| Model 2 (Adjusted) <sup>1</sup> |                                            |                               |                  |
| Place to go for healthcare      |                                            |                               | <b>&lt;0.001</b> |
| No place                        | 1.00 [Reference]                           | 2.4(1.9,3.0)                  |                  |
| HBV vaccination                 |                                            |                               | <b>0.0003</b>    |
| No doses                        | 1.00 [Reference]                           | 1.6(1.3,2.0)                  |                  |
| General health condition        |                                            |                               | 0.5              |
| Fair or poor                    | 1.00 [Reference]                           | 0.9(0.8,1.1)                  |                  |
| Covered by health insurance     |                                            |                               | <b>0.0003</b>    |
| No                              | 1.00 [Reference]                           | 1.8(1.4,2.3)                  |                  |
|                                 | Federal ≥ 100% <sup>3</sup><br>OR (95% CI) | Federal < 100%<br>OR (95% CI) |                  |
| Model 2 (Adjusted) <sup>2</sup> |                                            |                               |                  |
| Place to go for healthcare      |                                            |                               | <b>0.03</b>      |
| No place                        | 1.00 [Reference]                           | 1.5(1.0,2.0)                  |                  |
| HBV vaccination                 |                                            |                               | 0.93             |
| No doses                        | 1.00 [Reference]                           | 1.0(0.7,1.5)                  |                  |
| General health condition        |                                            |                               | <b>&lt;0.001</b> |
| Fair or poor                    | 1.00 [Reference]                           | 2.4(1.7,3.3)                  |                  |
| Covered by health insurance     |                                            |                               | <b>&lt;0.001</b> |
| No                              | 1.00 [Reference]                           | 2.8(2.0,4.0)                  |                  |

<sup>1</sup>Adjusted for demographic characteristics, including race/ethnicity, age, education, BMI, smoking status, and the ratio of family income to poverty. <sup>2</sup>Adjusted for demographic characteristics, including gender, race/ethnicity, age, education, smoking status, and BMI. <sup>3</sup>Federal poverty level. Modeled the odds of no place to go for healthcare, no HBV vaccination, fair or poor health condition, and not covered by health insurance. Bolded p-value indicated significance.
